# Supplementary material for: Ad-layers enhance graphene's performance
Source: Royal Society of Chemistry journal article supplement (doi:10.1039/c5ra18984e), 2015-01-01
Supplement: c5ra18984e1.pdf [file c5ra18984e1.pdf]

## Ad-layers enhance graphene's performance

Ting-Wei Chen<sup>1</sup>, Ya-Ping Hsieh<sup>1\*</sup> and Mario Hofmann<sup>2</sup>

<sup>1</sup> Graduate Institute of Opto-Mechatronics, National Chung Cheng University,  
Chiayi, 62102, Taiwan

<sup>2</sup> Department of Material Science and Engineering, National Cheng Kung  
University, Tainan, 70101, Taiwan

E-mail: [yphsieh@ccu.edu.tw](mailto:yphsieh@ccu.edu.tw);

### Figures

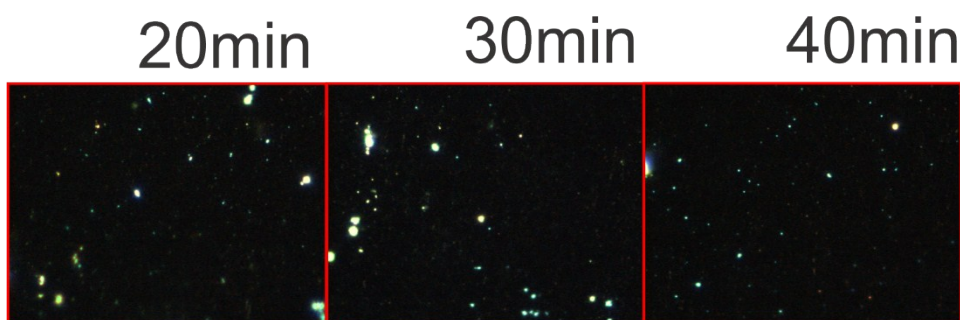

**Figure S1.** Effect of electropolishing on catalyst morphology: (a, b, c) Dark field Optical micrographs of Cu foil after 20, 30 and 40 minutes electropolishing.

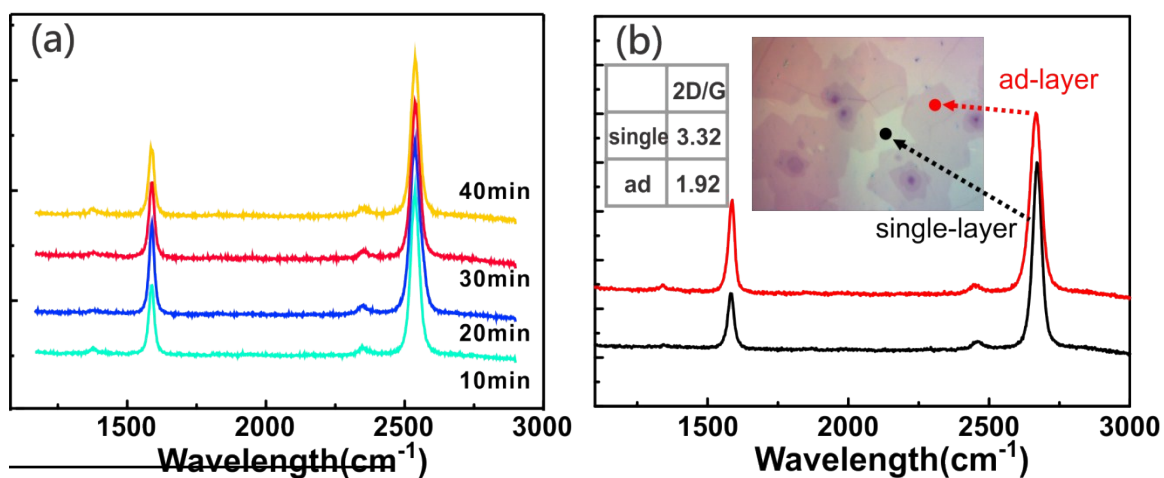

**Figure S2.** (a) Raman spectra of graphene transferred from graphene/Cu grown with Cu foil electropolished with 10, 20, 30 and 40 minutes. (b) Raman spectra of two specific points within an OM image, (inset) table with averaged  $I_{2D}/I_G$  ratio for both positions

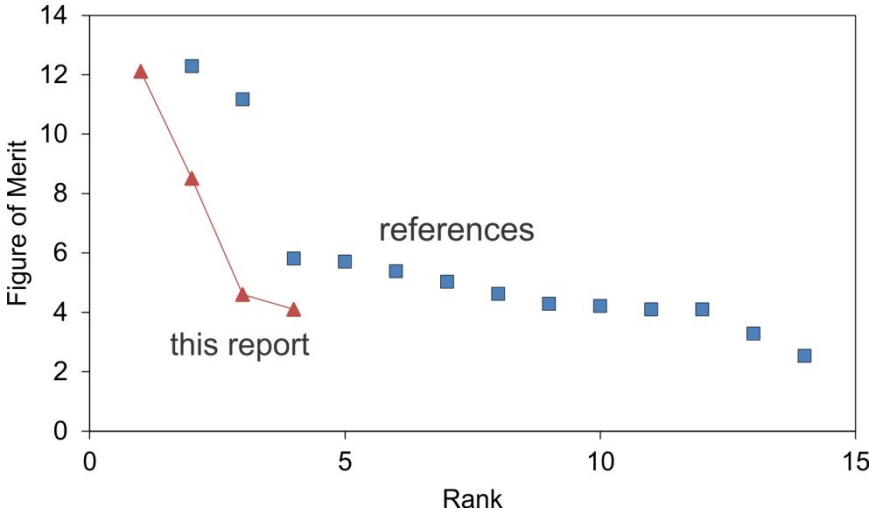

**Figure S3.** Comparison of the here reported Figure of Merit at different ad-layer coverage to literature values of CVD graphene transferred using  $FeCl_3$ .<sup>1-7</sup>

## Reference

1. X. Dong, P. Wang, W. Fang, C.-Y. Su, Y.-H. Chen, L.-J. Li, W. Huang and P. Chen, *Carbon*, 2011, **49**, 3672-3678.
2. Y. Wang, X. Chen, Y. Zhong, F. Zhu and K. P. Loh, *Applied Physics Letters*, 2009, **95**, 063302.
3. I. Vlassiuk, P. Fulvio, H. Meyer, N. Lavrik, S. Dai, P. Datskos and S. Smirnov, *Carbon*, 2013, **54**, 58-67.
4. K. S. Kim, Y. Zhao, H. Jang, S. Y. Lee, J. M. Kim, K. S. Kim, J. H. Ahn, P. Kim, J. Y. Choi and B. H. Hong, *Nature*, 2009, **457**, 706-710.
5. G. Jo, M. Choe, C. Y. Cho, J. H. Kim, W. Park, S. Lee, W. K. Hong, T. W. Kim,

- S. J. Park, B. H. Hong, Y. H. Kahng and T. Lee, *Nanotechnology*, 2010, **21**, 175201.
6. K. C. Kwon, K. S. Choi and S. Y. Kim, *Advanced Functional Materials*, 2012, **22**, 4724-4731.
  7. G. H. Han, F. Gunes, J. J. Bae, E. S. Kim, S. J. Chae, H. J. Shin, J. Y. Choi, D. Pribat and Y. H. Lee, *Nano letters*, 2011, **11**, 4144-4148.
